# Supplementary material for: Overloaded and Unrestrained: A Qualitative Study with Local Experts Exploring Factors Affecting Child Car Restraint Use in Cape Town, South Africa
Source: MDPI journal article supplement (doi:10.3390/ijerph17144974), 2020-07-10
Supplement: s1 [file s1]

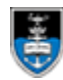

# Child restraint use in South Africa: interviews with local experts

## In-depth interviews

Macro level (e.g. policy makers in health and transport).

| Theme of investigation                              | Questions                                                                                                                                                                                                                                                                                                                                                                                                                                                                                                                                                                                                                                                                                                                                                                                                                        |
|-----------------------------------------------------|----------------------------------------------------------------------------------------------------------------------------------------------------------------------------------------------------------------------------------------------------------------------------------------------------------------------------------------------------------------------------------------------------------------------------------------------------------------------------------------------------------------------------------------------------------------------------------------------------------------------------------------------------------------------------------------------------------------------------------------------------------------------------------------------------------------------------------|
| Road Safety in Cape Town, South Africa              | <ul style="list-style-type: none"> <li>Do you think road traffic collisions, injuries and deaths among children are a problem in Cape Town?</li> <li>How are children transported in the city?</li> <li>[Probe: is this the same for all socioeconomic groups in the city?]</li> <li>How do you think we can decrease the incidence of road traffic injuries among children?</li> </ul>                                                                                                                                                                                                                                                                                                                                                                                                                                          |
| Child restraints as an intervention                 | <ul style="list-style-type: none"> <li>Do you think child restraints keep children safe in vehicles?</li> <li>Should <b>all</b> children in a vehicle be restrained?<br/>[Probe: what about if there are more than three children in a car. What do you think the parent should do?]</li> <li>Do you think that getting children into child restraints will make a big difference to the incidence of child road traffic injuries and deaths?</li> <li>Do you think there are missing elements in the amendment to the National Road Traffic Act passed in October 2014?<br/>[Probe: the amendment only covers children up to the age of 3 years to wear child restraints. Please comment.]</li> <li>How old do you think children should be before they sit in the front seat of a vehicle using an adult seat-belt?</li> </ul> |
| Barriers and facilitators to using child restraints | <ul style="list-style-type: none"> <li>Why do you think child restraints are not being used (despite the new law)?</li> <li>Do you know how much (on average) a SABS approved child restraint costs?</li> <li>Are there any non-SABS approved child restraints being sold in Cape Town?</li> <li>What do you think would increase the uptake of child restraints?<br/>[Probe: would a borrowing scheme or a give away scheme increase utilization? Comment]</li> <li>Do you think that parents require more education about the benefits of using a child restraint?</li> <li>Do you think the private sector has a role to play in child road safety?</li> </ul>                                                                                                                                                                |

|                                                                                | [Probe: If yes, should they be approached to subsidize or donate child restraints?]                                                                                                                                                                                                                                                                                                                                                                                                                                                                                                                                                                                                                                                                                                                                                                                                                                                                                                                                                                                                              |
|--------------------------------------------------------------------------------|--------------------------------------------------------------------------------------------------------------------------------------------------------------------------------------------------------------------------------------------------------------------------------------------------------------------------------------------------------------------------------------------------------------------------------------------------------------------------------------------------------------------------------------------------------------------------------------------------------------------------------------------------------------------------------------------------------------------------------------------------------------------------------------------------------------------------------------------------------------------------------------------------------------------------------------------------------------------------------------------------------------------------------------------------------------------------------------------------|
| Futuristic interventions for road safety                                       | <ul style="list-style-type: none"> <li>• In your opinion, which other interventions would potentially be successful in reducing child road traffic injuries in the city? [Probe: Do you think targeting interventions directly for children will prove to be beneficial or should road safety in general be improved]</li> <li>• What other policies are needed to keep Cape Town's children safe on the roads?</li> <li>• Do you have any further suggestions?</li> </ul>                                                                                                                                                                                                                                                                                                                                                                                                                                                                                                                                                                                                                       |
| Meso level (e.g. health care workers, road safety practitioners, researchers). |                                                                                                                                                                                                                                                                                                                                                                                                                                                                                                                                                                                                                                                                                                                                                                                                                                                                                                                                                                                                                                                                                                  |
| Theme of investigation                                                         | Questions                                                                                                                                                                                                                                                                                                                                                                                                                                                                                                                                                                                                                                                                                                                                                                                                                                                                                                                                                                                                                                                                                        |
| Road Safety in Cape Town, South Africa                                         | <ul style="list-style-type: none"> <li>• Do you think road traffic collisions, injuries and deaths among children are a problem in Cape Town?</li> <li>• How are children transported? [Probe: is this the same for all socioeconomic groups in the city?]</li> <li>• How do you think we can decrease the incidence of road traffic injuries among children?</li> </ul>                                                                                                                                                                                                                                                                                                                                                                                                                                                                                                                                                                                                                                                                                                                         |
| Child restraints as an intervention                                            | <ul style="list-style-type: none"> <li>• Do you think that child restraints will save children's lives?</li> <li>• [Probe: what kind of injuries do you think that child restraints will prevent?]</li> <li>• Do you think that child restraints will increase any specific type of injury?</li> <li>• How old do you think children should be before they sit in the front seat of a vehicle using an adult seat-belt?</li> <li>• Should all children in a vehicle be restrained?</li> <li>• [Probe: what about if there are more than three children in a car. What do you think the parent should do?]</li> <li>• Do you think that getting children into child restraints will make a big difference to the incidence of child road traffic injuries and deaths?</li> <li>• Do you think that health workers have a role to play in primary prevention?</li> <li>• [Probe: in some countries doctors and nurses provide brief interventions to parents who bring children in with an injury. Do you think this would be feasible in busy Cape Town health facilities?]</li> <li>•</li> </ul> |

|                                                     |                                                                                                                                                                                                                                                                                                                                                                                                                                                                                                                                                                                                                                                                                                                                                                               |
|-----------------------------------------------------|-------------------------------------------------------------------------------------------------------------------------------------------------------------------------------------------------------------------------------------------------------------------------------------------------------------------------------------------------------------------------------------------------------------------------------------------------------------------------------------------------------------------------------------------------------------------------------------------------------------------------------------------------------------------------------------------------------------------------------------------------------------------------------|
| Barriers and facilitators to using child restraints | <ul style="list-style-type: none"> <li>• Why do you think child restraints are not being used?</li> <li>• Do you know how much a SABS approved child restraint costs?</li> <li>• Are there any non-SABS approved child restraints being sold in Cape Town?</li> <li>• Do you think that parents require more education about the benefits of using a child restraint?</li> <li>• What other barriers are there to not using child restraints?</li> <li>• Do you think that providing child restraints (either when a mother leaves the maternity centre or at a well-baby clinic) would increase awareness about their usefulness and lead to an increased uptake of their use?</li> <li>• What else do you think could facilitate the uptake of child restraints?</li> </ul> |
| Futuristic interventions for road safety            | <ul style="list-style-type: none"> <li>• In your opinion, which other interventions would potentially be successful in reducing child road traffic injuries in the city?</li> <li>• [Probe: Do you think targeting interventions directly for children will prove to be beneficial or should road safety in general be improved]</li> <li>• Do you have any further suggestions?</li> </ul>                                                                                                                                                                                                                                                                                                                                                                                   |
